# Supplementary material
Source: HighWire-hosted journal article supplement (https://molpharm.aspetjournals.org/highwire/filestream/83873/field_highwire_adjunct_files/0/116319_Supplemental_files.pdf)

## Supplemental information

### **T-cell protein tyrosine phosphatase (TCPTP) is irreversibly inhibited by etoposide-quinone, a reactive metabolite of the chemotherapy drug etoposide**

Qing NIAN, Jérémy BERTHELET, Wenchao ZHANG, Linh-Chi BUI, Rongxing LIU, Ximing XU, Romain DUVAL, Saravanan GANESAN, Thibaut LEGER, Christine CHOMIENNE, Florent BUSI, Fabien GUIDEZ, Jean-Marie DUPRET and Fernando RODRIGUES LIMA

Université de Paris, BFA, UMR 8251, CNRS, F-75013, Paris, France (QN, JB,WZ, LCB,RL, FB, JMD, FRL); Key Laboratory of Marine Drugs, Chinese Ministry of Education, School of Medicine and Pharmacy, Ocean University of China, 5 Yushan Road, Qingdao, 266003, China (XX); Université de Paris, BIGR, UMRS 1134, INSERM, F-75015, Paris, France (RD); Université de Paris, Institut de Recherche Saint-Louis, UMRS 1131, INSERM, F-75010, Paris, France (SG, CC, FG); Université de Paris, IJM, UMR 7592, CNRS, F-75013, Paris, France (TL); Service de Biologie Cellulaire, Assistance Publique des Hôpitaux de Paris, Hôpital Saint Louis, F-75010, Paris, France (CC)

**METHODS****RT-qPCR of STAT1 regulated genes from Jurkat cells**

Jurkat cells ( $5 \times 10^6$ ) were washed three times with PBS and then treated with DMSO (Control) or 50  $\mu\text{M}$  EQ for 1 h in PBS at 37 °C (5%  $\text{CO}_2$ ). Cells were washed and further incubated for 30 min in fresh medium supplemented with 10 ng/ml of human  $\text{IFN}\gamma$ . Cells were finally rinsed three times with fresh medium and maintained at 37 °C (5%  $\text{CO}_2$ ) for 3 h. Total RNA from the cells was extracted using Trizol reagent (Invitrogen Carlsbad, CA, USA). 500 ng of the extracted RNA was converted into cDNA using superscript II cDNA kit (Invitrogen Carlsbad, CA, USA). The expression of three well-known STAT1 regulated genes (*IRF1*, *GBP1* and *APOL1*) (Hartman *et al.*, Genes & Dev., 2005; Reardon and McKay, J. Immunol., 2007) were studied using SYBR green method (Applied biosystems, Thermo Fischer Scientific, Rockford, IL, USA) and was run in a 7500 Fast Real-time PCR System (Applied Bio-systems, Carlsbad, CA). The Ct values of the target genes were normalized with *RPL19* (house keeping gene) and the fold differences were calculated using  $2^{-\Delta\Delta\text{Ct}}$  method. The primer sequences of the genes used in the experiments were :

*IRF1* (For: CAACAGATGAGGATGAGGAAGGGAA; Rev: CCATAGACAGAGGTGGGCTGG), *GBP1* (For: ACAGGGTCCAGTTGCTGAAAGA; Rev: TTGGTTAGGGGTGACAGGAAGG), *APOL1* (For: GCTGCTGCTGAACTGCCC; Rev: TCTGTACTGCTGGCCTTTATCGT) and *RPL19* (For: GGCTCGCCTCTAGTGCCTC; Rev: CAAGGTGTTTTCCGGCATC).

**Effects of etoposide and etoposide quinone on PTP1B activity**

Human PTP1B (catalytic domain residues 1-321) was expressed and purified from *E. coli* as described previously (Krishnan *et al.*, 2018). Recombinant PTP1B (1  $\mu\text{M}$ ) was incubated with ETOP or different concentrations of EQ in 100 mM sodium acetate, pH 6 for 30 minutes at 37 °C (total volume of 50  $\mu\text{l}$ ). Samples were diluted 10 times with acetate buffer then assayed for residual phosphatase activity using pNPP as described previously (Montalibet *et al.*, 2005).

**LEGENDS****Supplementary Figure 1: Determination of EQ  $\text{IC}_{50}$  for Human TCPTP inhibition**

EQ data from figure 1 were analyzed by nonlinear regression (using Qtiplot) in order to determine  $\text{IC}_{50}$  and fitted to the Hill's equation as described under Methods.

**Supplementary Figure 2: ETOP activated to EQ by myeloperoxidase inhibits TCPTP activity**

(A) Effect of ETOP activation to EQ by peroxidase/ $\text{H}_2\text{O}_2$  on TCPTP activity measured by pNPP dephosphorylation. Following the procedure described in Materials and Methods, 5 units of active or boiled peroxidase were incubated with 100  $\mu\text{M}$  ETOP combined with 100  $\mu\text{M}$   $\text{H}_2\text{O}_2$  in parallel to the following different control conditions: Ctrl (untreated control); 100  $\mu\text{M}$  ETOP; 40  $\mu\text{M}$  EQ. Results are the mean of three independent experiments, error bars indicate S.D. \*  $p < 0.05$  determined using ANOVA followed by Dunnett's post-hoc analysis. NBT (B) and IAF (C) labeling experiments were carried out and analyzed as described in Methods. Membranes shown here are representative of three independent experiments.

**Supplementary Figure 3: ETOP activated to EQ by myeloperoxidase inhibits TCPTP activity**

Jurkat cells were treated with EQ (50  $\mu\text{M}$ ) for 1 h, then incubated or not with  $\text{IFN}\gamma$  for 30 min. Relative gene expression of *APOL1*, *GBP1* and *IRF1* were analyzed by RT-qPCR. Error bars indicate S.D. \*  $p < 0.05$  compared with control (Ctrl).

Supplementary Figure 4: Effect of ETOP and EQ on PTP1B activity

1  $\mu$ M PTP1B was incubated with 100  $\mu$ M ETOP and 5 to 40  $\mu$ M EQ for 30 min at 37°C and diluted 10-fold prior to measurement of residual activity in the presence of 5 mM pNPP as described in the Methods section. Results are the mean of three independent experiments, error bars indicate S.D.

**REFERENCES**

Hartman S E, Bertone P, Nath AK, Royce TE, Gerstein M, Weissman S, Snyder M. (2005). Global changes in STAT target selection and transcription regulation upon interferon treatments. *Genes Dev* 19: 2953-2968.

Krishnan N, Bonham CA, Rus IA, Shrestha OK, Gauss CM, Haque A, Tocilj A, Joshua-Tor L, Tonks NK (2018). Harnessing insulin- and leptin-induced oxidation of PTP1B for therapeutic development. *Nat Commun* 9: 283.

Montalibet J, Skorey KI, Kennedy BP (2005). Protein tyrosine phosphatase: enzymatic assays. *Methods* 35: 2-8.

Reardon C, McKay D M (2007). TGF-beta suppresses IFN-gamma-STAT1-dependent gene transcription by enhancing STAT1-PIAS1 interactions in epithelia but not monocytes/macrophages. *J Immunol* 178: 4284-4295.

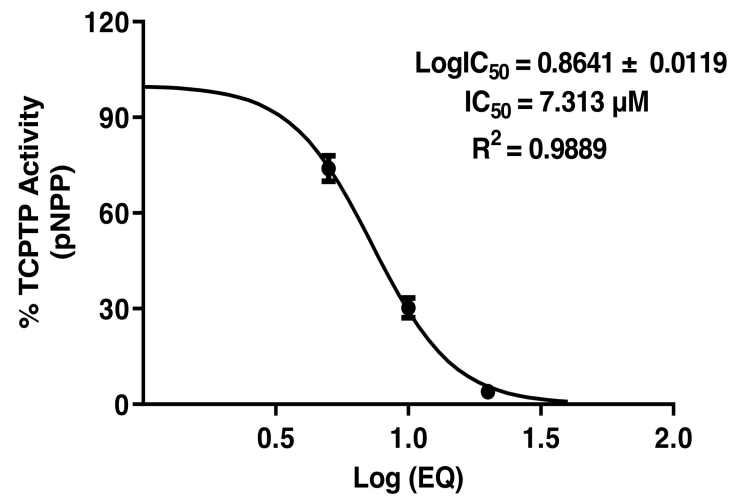

Supplementary Figure 1

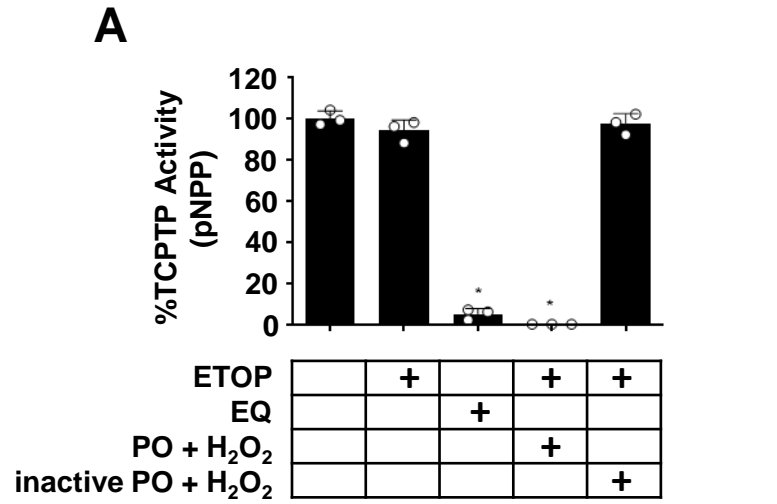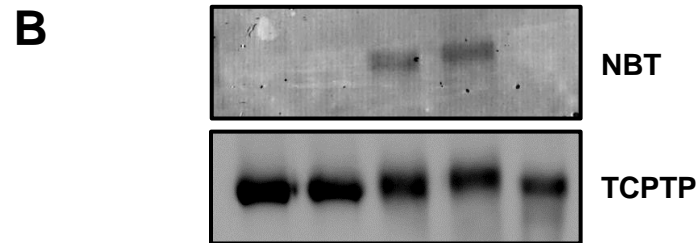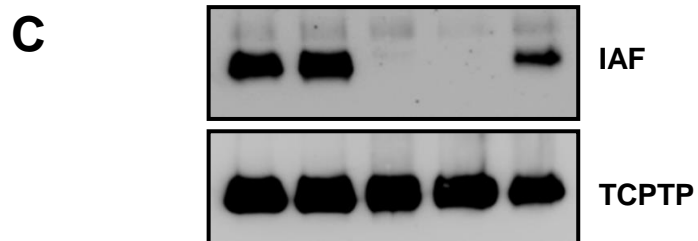

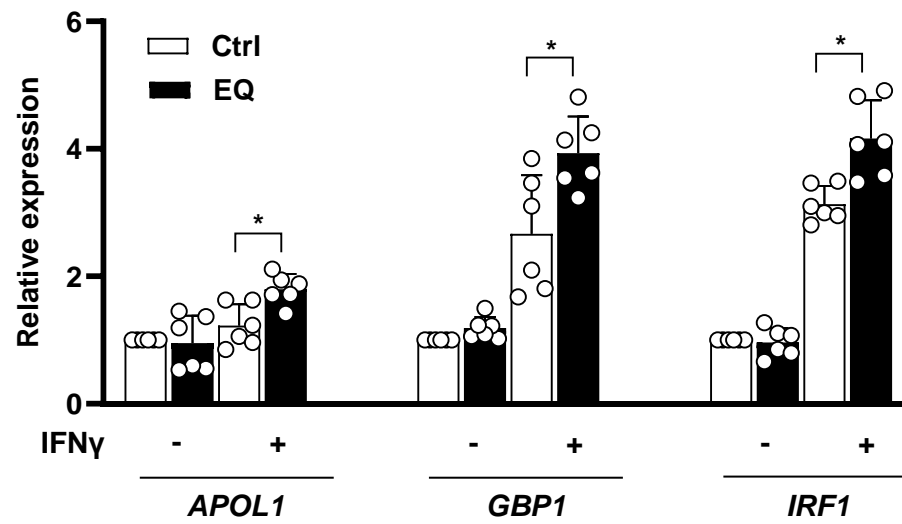

Supplementary Figure 3

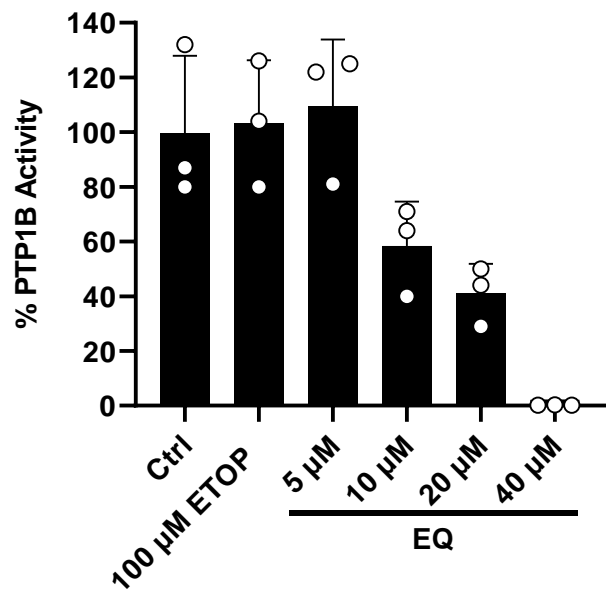

Supplement: 116319_Supplemental_files.pdf [file 116319_Supplemental_files.pdf]
